# Supplementary material for: Argon Adsorption on Cationic Gold Clusters Aun+ (n ≤ 20)
Source: MDPI journal article supplement (doi:10.3390/molecules26134082), 2021-07-04
Supplement: s1 [file s1]

## Supporting Information

### Argon adsorption on cationic gold clusters $\text{Au}_n^+$ ( $n \leq 20$ )

Piero Ferrari<sup>1</sup> and Ewald Janssens<sup>1,\*</sup>

<sup>1</sup>Quantum Solid-State Physics, Department of Physics and Astronomy, KU Leuven, Leuven, Belgium

\*Correspondence: ewald.janssens@kuleuven.be

#### 1. Ar adsorption site isomers of $\text{Au}_4\text{Ar}^+$ and $\text{Au}_6\text{Ar}^+$

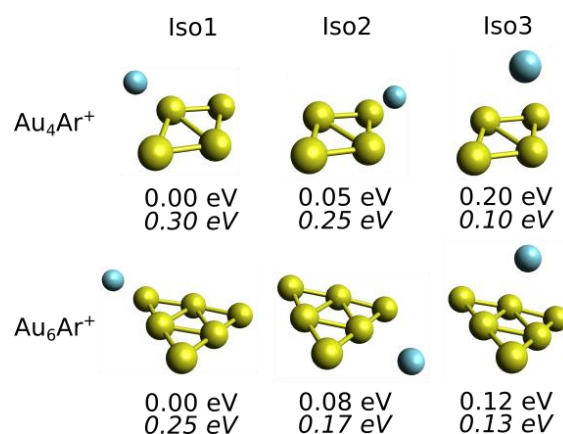

Figure S1. Ar adsorption site isomers of  $\text{Au}_4\text{Ar}^+$  and  $\text{Au}_6\text{Ar}^+$  clusters. The energies relative to the lowest energy adsorption site are presented below each structure, as well as the Ar adsorption energy ( $E_{\text{ads}}$ , in italics) of each isomer.

#### 2. Optimized geometries of $\text{Au}_n\text{Ar}_m^+$ ( $n = 3 - 20$ ; $m = 1 - 5$ ) clusters

The coordinates of those clusters are available through Github at [https://github.com/pferrari13/Au\\_nAr\\_m-XYZ-coordinates.git](https://github.com/pferrari13/Au_nAr_m-XYZ-coordinates.git)

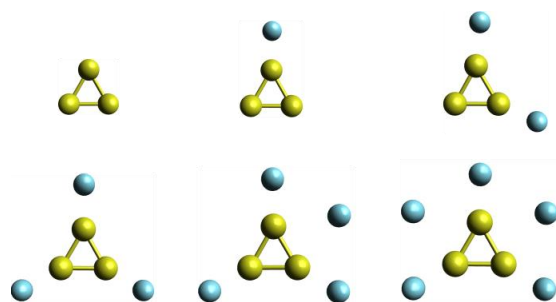

Figure S2. Optimized geometries of  $\text{Au}_3\text{Ar}_m^+$  ( $m = 0-5$ ).

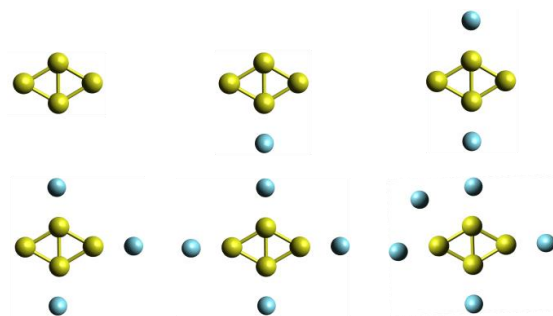

Figure S3. Optimized geometries of  $\text{Au}_4\text{Ar}_m^+$  ( $m = 0-5$ ).

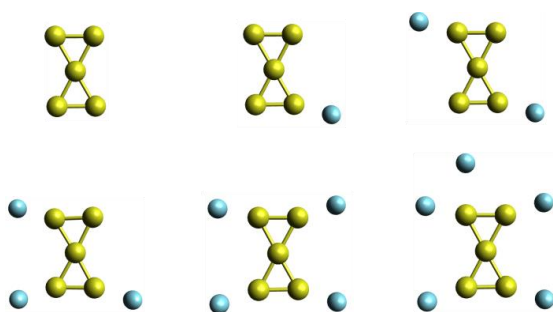

Figure S4. Optimized geometries of  $\text{Au}_5\text{Ar}_m^+$  ( $m = 0-5$ ).

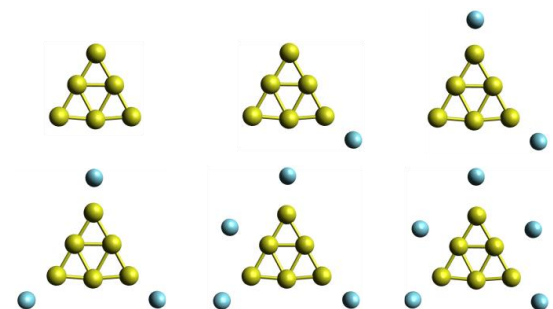

Figure S5. Optimized geometries of  $\text{Au}_6\text{Ar}_m^+$  ( $m = 0-5$ ).

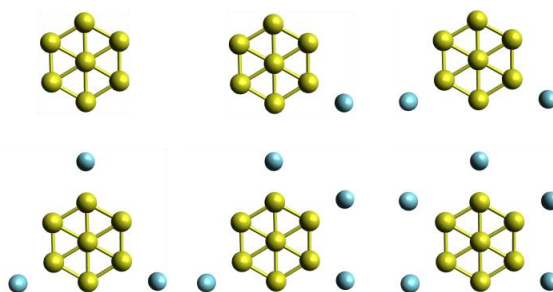

Figure S6. Optimized geometries of  $\text{Au}_7\text{Ar}_m^+$  ( $m = 0-5$ ).

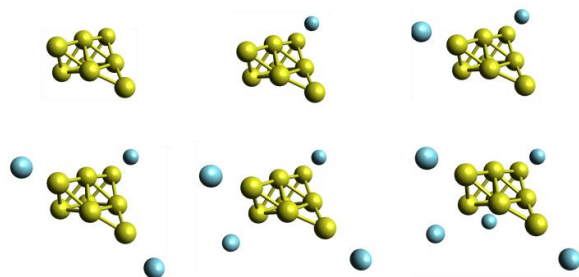

Figure S7. Optimized geometries of  $\text{Au}_8\text{Ar}_m^+$  ( $m = 0-5$ ).

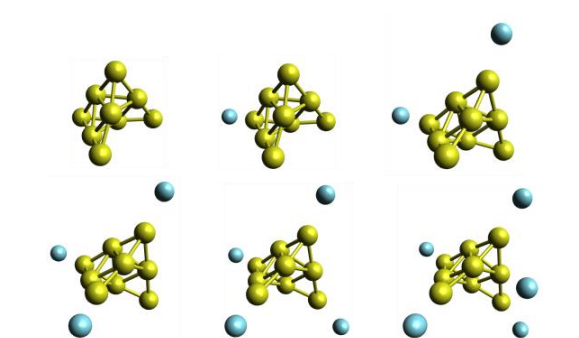

Figure S8. Optimized geometries of  $\text{Au}_9\text{Ar}_m^+$  ( $m = 0-5$ ).

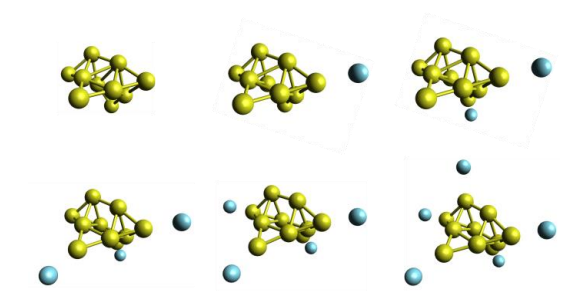

Figure S9. Optimized geometries of  $\text{Au}_{10}\text{Ar}_m^+$  ( $m = 0-5$ ).

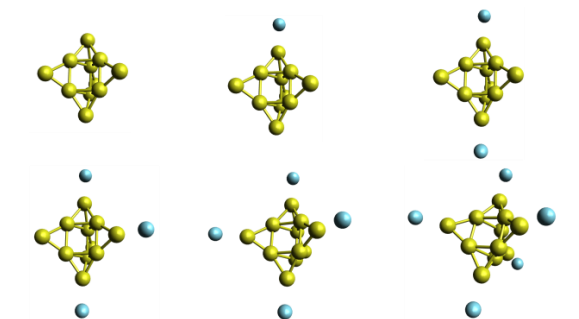

Figure S10. Optimized geometries of  $\text{Au}_{11}\text{Ar}_m^+$  ( $m = 0-5$ ).

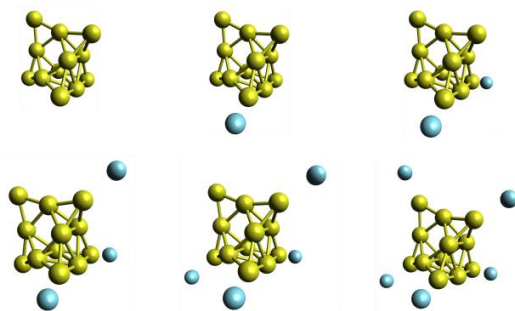

Figure S11. Optimized geometries of  $\text{Au}_{12}\text{Ar}_m^+$  ( $m = 0-5$ ).

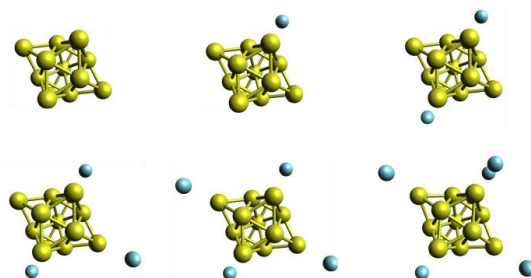

Figure S12. Optimized geometries of  $\text{Au}_{13}\text{Ar}_m^+$  ( $m = 0-5$ ).

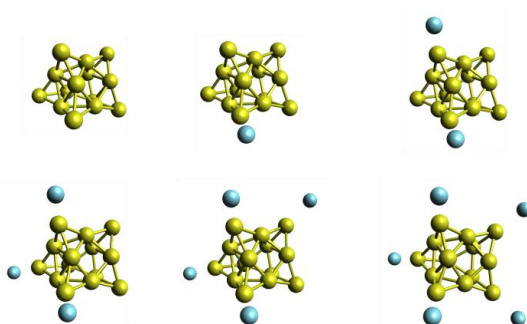

Figure S13. Optimized geometries of  $\text{Au}_{14}\text{Ar}_m^+$  ( $m = 0-5$ ).

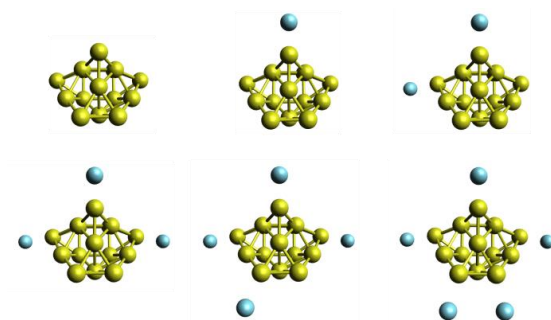

Figure S14. Optimized geometries of  $\text{Au}_{15}\text{Ar}_m^+$  ( $m = 0-5$ ).

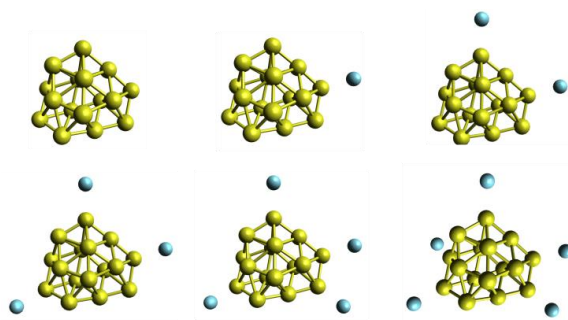

Figure S15. Optimized geometries of  $\text{Au}_{16}\text{Ar}_m^+$  ( $m = 0-5$ ).

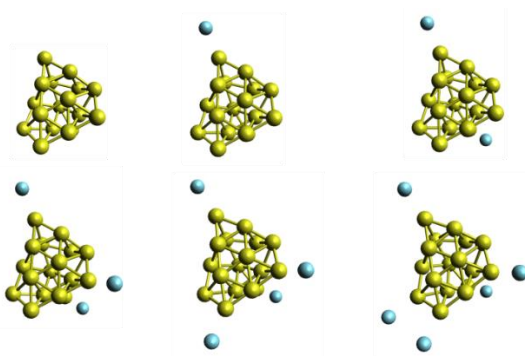

Figure S16. Optimized geometries of  $\text{Au}_{17}\text{Ar}_m^+$  ( $m = 0-5$ ).

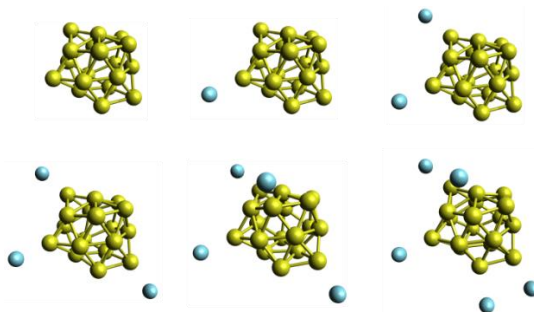

Figure S17. Optimized geometries of  $\text{Au}_{18}\text{Ar}_m^+$  ( $m = 0-5$ ).

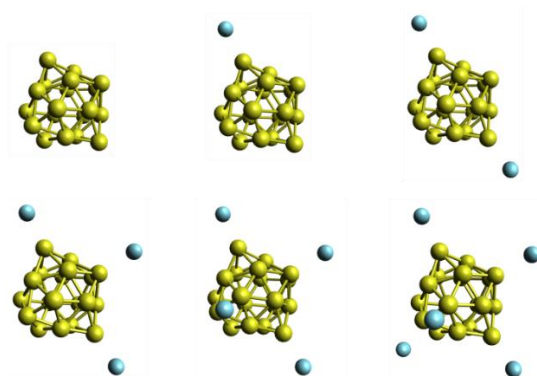

Figure S18. Optimized geometries of  $\text{Au}_{19}\text{Ar}_m^+$  ( $m = 0-5$ ).

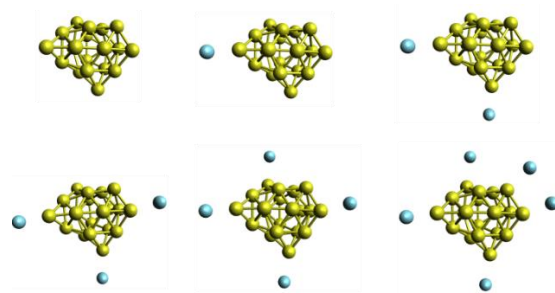

Figure S19. Optimized geometries of  $\text{Au}_{20}\text{Ar}_m^+$  ( $m = 0-5$ ).
